# Supplementary material for: Managing Inventory Over a Short Season: Models with Two Procurement Opportunities
Source: Atypon-hosted journal article supplement (doi:10.1287/msom.1070.0204), 2008-04-26
Supplement: msom.1070.0204-sm.pdf.pdf [file msom.1070.0204-sm.pdf.pdf]

Appendix for Managing Inventory over a Short Season: Models with Two Procurement Opportunities

## Appendix

### Variation Diminishing Property (VDP) of $PF_2$

Let  $M(u)$  be a real function on  $(-\infty, \infty)$ ,  $f$  be  $PF_2$  on  $[0, \infty)$  and zero on  $(-\infty, 0]$ . Suppose

$M(u)$  changes sign at most once on  $(-\infty, \infty)$ . Then the transformation

$$g(y) = \int_{-\infty}^{\infty} M(u) f(y-u) du$$

also changes sign at most once over  $(-\infty, \infty)$ . Moreover, if both  $g$  and  $M$  change sign once, their sign changes occur in the same order (see Karlin 1968).

**Proof of Lemma 1.** 1) Note that  $G_{\tau+L,T}(y_{\tau+L})$  is the expected newsvendor type cost with a beginning inventory level  $y_{\tau+L}$ , composed of the expected cost for overage in each remaining period and for underage and disposal at the end of period  $T$ . It follows that  $G_{\tau+L,T}(y_{\tau+L})$  is convex in  $y_{\tau+L}$ .

2) Note that  $B_t^x(x_t)$  is the expected sales in period  $t$  multiplied by a constant  $b_t$ , minus the expected leftovers in period  $t$  multiplied by a constant  $h_t$ , in the newsvendor model with a beginning inventory level  $x_t$ . Thus  $B_t^x(x_t)$  is concave in  $x_t$ . Similarly,  $B_t^y(y_t)$  is concave in  $y_t$ .

3) Expanding the recursive equation (2), we get for  $t = \tau, \dots, \tau + l - 1$ ,

$$g_t(x_t, y_t) = \sum_{t'=t}^{\tau+L-1} E \left[ B_{t'}(x_t - \xi_{t,t'}, y_t - \xi_{t,t'}) \right] + \int_0^{\infty} G_{\tau+L,T}(y_t - \xi_{t,\tau+L-1}) f_{t,\tau+L-1}(\xi_{t,\tau+L-1}) d\xi_{t,\tau+L-1} \quad (12)$$

where  $E \left[ B_{t'}(x_t - \xi_{t,t'}, y_t - \xi_{t,t'}) \right]$  is the expectation of  $B_{t'}(x_t - \xi_{t,t'}, y_t - \xi_{t,t'})$  with respect to  $\xi_{t,t'}$ .

Then it follows, from the fact that  $B_{t'}(x_t, y_t)$  is separable in  $x_t$  and  $y_t$ , that  $g_t(x_t, y_t)$  is separable in

$x_t$  and  $y_t$ . Similarly, it follows, from the fact that  $B_{t'}(x_t, y_t)$  is convex in  $x_t$ , that  $g_t(x_t, y_t)$  is

convex in  $x_t$ . ■

Appendix for Managing Inventory over a Short Season: Models with Two Procurement Opportunities  
**Proof of Theorem 1.**

1) It is sufficient for us to consider only the case  $L > 0, b_\tau = \dots = b_{\tau+L-1} = 0$ , for which  $H_\tau(x_\tau, IP_\tau)$  can be written as

$$H_\tau(x_\tau, IP_\tau) = c_\tau(IP_\tau - x_\tau) + \sum_{t=\tau}^{\tau+L-1} h_t \int_0^{x_\tau} (x_\tau - \xi_{\tau,t}) f_{\tau,t}(\xi_{\tau,t}) d\xi_{\tau,t} \\ + \int_0^\infty G_{\tau+L,T}(IP_\tau - \xi_{\tau,\tau+L-1}) f_{\tau,\tau+L-1}(\xi_{\tau,\tau+L-1}) d\xi_{\tau,\tau+L-1}$$

The convexity of  $H_\tau(x_\tau, IP_\tau)$  with respect to  $IP_\tau$  follows directly by Lemma 1 part 1). Thus, a base-stock policy  $Q_\tau = \max\{IP_\tau^* - x_\tau, 0\}$  is the optimal ordering rule at the beginning of period  $\tau$ , where  $IP_\tau^* \geq 0$  is the value of  $IP_\tau$  that attains the minimum of  $H_\tau(x_\tau, IP_\tau)$  over  $[0, \infty)$ , leading to an expression for  $\rho_\tau(x_\tau)$  below:

$$\rho_\tau(x_\tau) = \begin{cases} H_\tau(x_\tau, IP_\tau^*) & \text{if } x_\tau < IP_\tau^* \\ H_\tau(x_\tau, x_\tau) & \text{if } x_\tau \geq IP_\tau^* \end{cases}$$

The convexity of  $\rho_\tau(x_\tau)$  is implied by the convexity of  $H_\tau(x_\tau, IP_\tau^*)$  and  $H_\tau(x_\tau, x_\tau)$  with respect to  $x_\tau$ , and by the inequality  $\frac{\partial H_\tau(x_\tau, IP_\tau)}{\partial IP_\tau} \geq 0$  for  $IP_\tau > IP_\tau^*$ .

To show that  $TC_I(Q_0)$  is convex in  $Q_0$ , it is sufficient to show that  $\rho_1(x_1)$  is convex in  $x_1$ . In view of the recursive equation (2), it is then sufficient to show that  $\rho_2(x_2)$  is convex in  $x_2$  since  $b_1 \int_{x_1}^\infty (\xi_1 - x_1) f_1(\xi_1) d\xi_1$  and  $h_1 \int_0^{x_1} (x_1 - \xi_1) f_1(\xi_1) d\xi_1$  are convex in  $x_1$ , where  $x_2 = x_1 - \xi_1$ . The rationale for this is that a convolution transformation of a convex function is a convex function and a summation of two convex functions is a convex function. Following the same logic, it is sufficient to show that  $\rho_\tau(x_\tau)$  is convex in  $x_\tau$ , which we have proved above. This concludes our proof for part 1).

Appendix for Managing Inventory over a Short Season: Models with Two Procurement Opportunities

2) Notice the condition  $L = T - \tau + 1, b_\tau = \dots = b_{\tau-1} = 0, b_T > 0$  implies that the backorder cost in periods

$\tau$  through  $\tau + L - 1$  is effectively charged independent of when the backorders occur and that  $b_T \leq c_u$

since otherwise the decision maker will not accept backorders. Thus,  $H_\tau(x_\tau, IP_\tau)$  can be written as

below

$$H_\tau(x_\tau, IP_\tau) = c_\tau(IP_\tau - x_\tau) + b_T \int_{x_\tau}^{IP_\tau} (\xi_{\tau,T} - x_\tau) f_{\tau,T}(\xi_{\tau,T}) d\xi_{\tau,T} + b_T \int_{IP_\tau}^{\infty} (IP_\tau - x_\tau) f_{\tau,T}(\xi_{\tau,T}) d\xi_{\tau,T} \\ + \sum_{t=\tau}^T h_t \int_0^{x_\tau} (x_\tau - \xi_{\tau,t}) f_{\tau,t}(\xi_{\tau,t}) d\xi_{\tau,t} + c_u \int_{IP_\tau}^{\infty} (\xi_{\tau,T} - IP_\tau) f_{\tau,T}(\xi_{\tau,T}) d\xi_{\tau,T} + c_d \int_0^{IP_\tau} (IP_\tau - \xi_{\tau,T}) f_{\tau,T}(\xi_{\tau,T}) d\xi_{\tau,T}$$

With a little algebra, it can be shown that  $\frac{\partial^2 H_\tau(x_\tau, IP_\tau)}{\partial IP_\tau^2} = (c_d + c_u - b_T) f_{\tau,T}(IP_\tau)$ . Since  $c_u \geq b_T$ , it

follows that  $\frac{\partial^2 H_\tau(x_\tau, IP_\tau)}{\partial IP_\tau^2} > 0$ . Therefore  $H_\tau(x_\tau, IP_\tau)$  is convex in  $IP_\tau$ . The proof for the convexity

of  $TC_1(Q_0)$  in  $Q_0$  is similar to the proof of part 1) of Theorem 1 above.

3) The backorder cost is effectively charged independent of when the backorders occur and that

$b_{\tau+L-1} \leq c_u$ . With a little algebra,  $H_\tau(x_\tau, IP_\tau)$  can be expressed as

$$H_\tau(x_\tau, IP_\tau) = c_\tau(IP_\tau - x_\tau) + b_{\tau+L-1} \int_{x_\tau}^{IP_\tau} (\xi_{\tau,\tau+L-1} - x_\tau) f_{\tau,\tau+L-1}(\xi_{\tau,\tau+L-1}) d\xi_{\tau,\tau+L-1} \\ + b_{\tau+L-1} (IP_\tau - x_\tau) \int_{IP_\tau}^{\infty} f_{\tau,\tau+L-1}(\xi_{\tau,\tau+L-1}) d\xi_{\tau,\tau+L-1} + \sum_{t=\tau}^{\tau+L-1} h_t \int_0^{x_\tau} (x_\tau - \xi_{\tau,t}) f_{\tau,t}(\xi_{\tau,t}) d\xi_{\tau,t} \\ + c_u \int_{IP_\tau}^{\infty} (\xi_{\tau,T} - IP_\tau) f_{\tau,T}(\xi_{\tau,T}) d\xi_{\tau,T} + (c_d + h_T) \int_0^{IP_\tau} (IP_\tau - \xi_{\tau,T}) f_{\tau,T}(\xi_{\tau,T}) d\xi_{\tau,T}$$

With some more analysis, we have  $\frac{\partial^2 H_\tau(x_\tau, IP_\tau)}{\partial IP_\tau^2} = -b_{\tau+L-1} f_{\tau,\tau+L-1}(IP_\tau) + (c_u + c_d + h_T) f_{\tau,T}(IP_\tau)$ .

Recall that the monotone likelihood ratio property (MLRP) holds for  $\frac{f_{\tau,T}(IP_\tau)}{f_{\tau,\tau+L-1}(IP_\tau)}$  over  $[0, \infty)$ . We see

that  $\frac{f_{\tau,T}(IP_\tau)}{f_{\tau,\tau+L-1}(IP_\tau)}$  is increasing in  $IP_\tau$ . If  $\frac{f_{\tau,T}(0)}{f_{\tau,\tau+L-1}(0)} \leq \frac{b_{\tau+L-1}}{c_u + c_d + h_T}$  and  $\frac{f_{\tau,T}(\infty)}{f_{\tau,\tau+L-1}(\infty)} \geq \frac{b_{\tau+L-1}}{c_u + c_d + h_T}$ ,

Appendix for Managing Inventory over a Short Season: Models with Two Procurement Opportunities

then there exists an  $\widetilde{IP}_\tau$  such that  $\frac{f_{\tau,T}(\widetilde{IP}_\tau)}{f_{\tau,\tau+L-1}(\widetilde{IP}_\tau)} = \frac{b_{\tau+L-1}}{c_u + c_d + h_\tau}$ . In case  $\frac{f_{\tau,T}(0)}{f_{\tau,\tau+L-1}(0)} > \frac{b_{\tau+L-1}}{c_u + c_d + h_\tau}$ ,  $\widetilde{IP}_\tau$

is defined as 0; in case  $\frac{f_{\tau,T}(\infty)}{f_{\tau,\tau+L-1}(\infty)} < \frac{b_{\tau+L-1}}{c_u + c_d + h_\tau}$ ,  $\widetilde{IP}_\tau$  is defined as  $\infty$ . Therefore we have

$$\frac{\partial^2 H_\tau(x_\tau, IP_\tau)}{\partial IP_\tau^2} \leq 0 \text{ for } 0 \leq IP_\tau \leq \widetilde{IP}_\tau \text{ and } \frac{\partial^2 H_\tau(x_\tau, IP_\tau)}{\partial IP_\tau^2} \geq 0 \text{ for } IP_\tau \geq \widetilde{IP}_\tau; \text{ that is, } H_\tau(x_\tau, IP_\tau) \text{ is}$$

concave-convex in  $IP_\tau$ : concave on  $[0, \widetilde{IP}_\tau]$  and convex on  $[\widetilde{IP}_\tau, \infty)$ . This leads to our conclusion.

4) To prove that  $H_\tau(x_\tau, IP_\tau)$  is unimodal in  $IP_\tau$ , it is sufficient to show that  $c_\tau + \frac{\partial g_i(x_i, y_i)}{\partial y_i}$  changes

sign at most once over  $(-\infty, \infty)$  for  $\tau \leq t \leq \tau + L - 1$ . We do it recursively starting from  $t = \tau + L - 1$ .

With a little algebra, we can see that

$$\begin{aligned} c_\tau + \frac{\partial g_{\tau+L-1}(x_{\tau+L-1}, y_{\tau+L-1})}{\partial y_{\tau+L-1}} \\ &= c_\tau + b_{\tau+L-1} \int_{y_{\tau+L-1}}^{\infty} f_{\tau+L-1}(\xi_{\tau+L-1}) d\xi_{\tau+L-1} + \int_0^{\infty} \frac{dG_{\tau+L,T}(y_{\tau+L-1} - \xi_{\tau+L-1})}{dy_{\tau+L-1}} f_{\tau+L-1}(\xi_{\tau+L-1}) d\xi_{\tau+L-1} \\ &= c_\tau + (b_{\tau+L-1} - c_u) \int_{y_{\tau+L-1}}^{\infty} f_{\tau+L-1}(\xi_{\tau+L-1}) d\xi_{\tau+L-1} + \int_0^{y_{\tau+L-1}} \frac{dG_{\tau+L,T}(y_{\tau+L-1} - \xi_{\tau+L-1})}{dy_{\tau+L-1}} f_{\tau+L-1}(\xi_{\tau+L-1}) d\xi_{\tau+L-1} \end{aligned}$$

By introducing a variable  $u = y_{\tau+L-1} - \xi_{\tau+L-1}$ , we have

$$c_\tau + \frac{\partial g_{\tau+L-1}(x_{\tau+L-1}, y_{\tau+L-1})}{\partial y_{\tau+L-1}} = \int_{-\infty}^{\infty} M(u, \tau + L - 1) f_{\tau+L-1}(y_{\tau+L-1} - u) du$$

where  $M(u, \tau + L - 1) = \begin{cases} c_\tau + b_{\tau+L-1} - c_u & \text{if } u < 0 \\ c_\tau + \frac{\partial G_{\tau+L,T}(u)}{\partial u} & \text{if } u \geq 0 \end{cases}$ . It is easy to see that  $M(u, \tau + L - 1)$  changes

sign at most once over  $(-\infty, \infty)$  in view that  $G_{\tau+L,T}$  is convex,  $\left. \frac{\partial G_{\tau+L,T}(u)}{\partial u} \right|_{u=0} = -c_u$ ,

$\lim_{u \rightarrow \infty} \frac{\partial G_{\tau+L,T}(u)}{\partial u} = \sum_{i=\tau+L}^T h_i + c_d$  and  $c_\tau + b_{\tau+L-1} - c_u \leq 0$ . As a result,  $c_\tau + \frac{\partial g_{\tau+L-1}(x_{\tau+L-1}, y_{\tau+L-1})}{\partial y_{\tau+L-1}}$  changes

Appendix for Managing Inventory over a Short Season: Models with Two Procurement Opportunities

sign at most once over  $(-\infty, \infty)$  with respect to  $y_{\tau+L-1}$ , and

$$c_\tau + \frac{\partial g_{\tau+L-1}(x_{\tau+L-1}, y_{\tau+L-1})}{\partial y_{\tau+L-1}} \Big|_{y_{\tau+L-1}=0} = c_\tau + b_{\tau+L-1} - c_u \leq 0.$$

Suppose  $c_\tau + \frac{\partial g_{t+1}(x_{t+1}, y_{t+1})}{\partial y_{t+1}}$  changes sign at most once and has a non-positive value of

$c_\tau + \sum_{j=t+1}^{\tau+L-1} b_j - c_u$  at  $y_{t+1} = 0$ . For  $c_\tau + \frac{\partial g_t(x_t, y_t)}{\partial y_t}$ , we have

$$\begin{aligned} c_\tau + \frac{\partial g_t(x_t, y_t)}{\partial y_t} &= c_\tau + \left( \sum_{j=t}^{\tau+L-1} b_j - c_u \right) \int_{y_t}^{\infty} f_t(\xi_t) d\xi_t + \int_0^{y_t} \frac{\partial g_{t+1}(x_t - \xi_t, y_t - \xi_t)}{\partial y_t} f_t(\xi_t) d\xi_t \\ &= \int_{-\infty}^{\infty} M(u, t) f_t(y_t - u) du \quad \text{where} \\ M(u, t) &= \begin{cases} c_\tau + \sum_{j=t}^{\tau+L-1} b_j - c_u & \text{if } u < 0 \\ c_\tau + \frac{\partial g_{t+1}(x_t + u - y_t, v)}{\partial v} \Big|_{v=u} & \text{if } u \geq 0 \end{cases} \end{aligned}$$

It can be seen that  $M(u, t)$  changes sign at most once over  $(-\infty, \infty)$  since  $M(u, t) \leq 0$  for  $u < 0$  and

$c_\tau + \frac{\partial g_{t+1}(x_t + u - y_t, v)}{\partial v} \Big|_{v=u}$  changes sign at most once over  $[0, \infty)$  from “-” to “+”. Therefore

$c_\tau + \frac{\partial g_t(x_t, y_t)}{\partial y_t}$  changes sign at most once and  $c_\tau + \frac{\partial g_t(x_t, y_t)}{\partial y_t} \Big|_{y_t=0} = c_\tau + \sum_{j=t}^{\tau+L-1} b_j - c_u \leq 0$ . By

induction, the conclusion is established. The proof for the convexity of  $TC_t(Q_0)$  in  $Q_0$  is similar to that for part 1) of Theorem 1 above.

5) To prove that  $H_\tau(x_\tau, IP_\tau)$  has at most one local minimum and one local maximum with respect to

$IP_\tau$ , it is sufficient to show that  $c_\tau + \frac{\partial g_t(x_t, y_t)}{\partial y_t}$  changes sign at most twice over  $(-\infty, \infty)$  for

Appendix for Managing Inventory over a Short Season: Models with Two Procurement Opportunities

$\tau \leq t \leq \tau + L - 1$ . If  $c_\tau + \sum_{j=\tau}^{\tau+L-1} b_j - c_u \leq 0$ , then the result is evident by part 4) since  $PF_2$  includes  $PF_3$ .

Next we assume  $c_\tau + \sum_{j=\tau}^{\tau+L-1} b_j - c_u > 0$ . Define  $t^* = \max \left\{ t \mid c_\tau + \sum_{j=t}^{\tau+L-1} b_j - c_u > 0, \tau \leq t \leq \tau + L - 1 \right\}$ . By

part 4),  $c_\tau + \frac{\partial g_t(x_t, y_t)}{\partial y_t}$  changes sign at most once over  $(-\infty, \infty)$  for  $t > t^*$ . We next show that, for any

$t \leq t^*$ ,  $c_\tau + \frac{\partial g_t(x_t, y_t)}{\partial y_t}$  changes sign at most twice over  $(-\infty, \infty)$ . We do so recursively starting from

$t = t^*$ . With a little algebra, we can obtain  $c_\tau + \frac{\partial g_{t^*}(x_{t^*}, y_{t^*})}{\partial y_{t^*}} = \int_{-\infty}^{\infty} M(u, t^*) f_{t^*}(y_{t^*} - u) du$ , where

$$M(u, t^*) = \begin{cases} c_\tau + \sum_{j=t^*}^{\tau+L-1} b_j - c_u & \text{if } u < 0 \\ c_\tau + \frac{\partial g_{t^*+1}(x_{t^*+1}, y_{t^*+1}, v)}{\partial v} \Big|_{v=u} & \text{if } u \geq 0 \end{cases}$$

It can be seen that  $M(u, t^*)$  changes sign at most twice over  $(-\infty, \infty)$  since  $M(u, t^*) > 0$  for  $u < 0$ ,

and  $c_\tau + \frac{\partial g_{t^*+1}(x_{t^*+1}, y_{t^*+1}, v)}{\partial v} \Big|_{v=u}$  changes sign at most once over  $[0, \infty)$  starting from non-positive.

Therefore  $c_\tau + \frac{\partial g_{t^*}(x_{t^*}, y_{t^*})}{\partial y_{t^*}}$  changes sign at most twice and has a positive value of  $c_\tau + \sum_{j=t^*}^{\tau+L-1} b_j - c_u$  at

$y_{t^*} = 0$ . For  $t^* - 1$ , we have:

Appendix for Managing Inventory over a Short Season: Models with Two Procurement Opportunities

$$c_\tau + \frac{\partial g_{t^*-1}(x_{t^*-1}, y_{t^*-1})}{\partial y_{t^*-1}} = \int_{-\infty}^{\infty} M(u, t^* - 1) f_{t^*-1}(y_{t^*-1} - u) du \quad \text{where}$$

$$M(u, t^* - 1) = \begin{cases} c_\tau + \sum_{j=t^*-1}^{\tau+L-1} b_j - c_u & \text{if } u < 0 \\ c_\tau + \left. \frac{\partial g_{t^*}(x_{t^*-1} + u - y_{t^*-1}, v)}{\partial v} \right|_{v=u} & \text{if } u \geq 0 \end{cases}$$

It can be seen that  $M(u, t^* - 1)$  changes sign at most twice over  $(-\infty, \infty)$  since  $M(u, t^* - 1) > 0$  for

$u < 0$ , and  $c_\tau + \left. \frac{\partial g_{t^*}(x_{t^*-1} + u - y_{t^*-1}, v)}{\partial v} \right|_{v=u}$  changes sign at most twice over  $[0, \infty)$  starting from “+”.

Therefore  $c_\tau + \frac{\partial g_{t^*-1}(x_{t^*-1}, y_{t^*-1})}{\partial y_{t^*-1}}$  changes sign at most twice and has a positive value of

$c_\tau + \sum_{j=t^*-1}^{\tau+L-1} b_j - c_u$  at  $y_{t^*-1} = 0$ . Similar logic can be applied to  $t = t^* - 2, \dots, 2, 1$ . Thus, part 5) follows. ■

**Proof of Theorem 2.**

1) The outline for the proof is: we first show that for big-enough beginning inventory level  $x_t$ ,  $j_t(x_t) \geq k_t(x_t)$ ; then we show that  $j_t(x_t)$  and  $k_t(x_t)$  cross only once so that an  $(s, S)$  policy is the optimal rule for whether to place the second order and how much when ordering at the beginning of period  $t$ . By the definition of  $H_t(x_t, IP_t)$  and  $L = 0$ , it can be seen that

$$H_t(x_t, IP_t) = c_t(IP_t - x_t) + \sum_{t'=t}^T h_{t'} \int_0^{IP_t} (IP_t - \xi_{t,t'}) f_{t,t'}(\xi_{t,t'}) d\xi_{t,t'}$$

$$+ c_u \int_{IP_t}^{\infty} (\xi_{t,T} - IP_t) f_{t,T}(\xi_{t,T}) d\xi_{t,T} + c_d \int_0^{IP_t} (IP_t - \xi_{t,T}) f_{t,T}(\xi_{t,T}) d\xi_{t,T}$$

It can be verified that for any  $t$ ,  $H_t(x_t, IP_t)$  is convex in  $IP_t$  with the limits  $\lim_{IP_t \rightarrow \infty} H_t(x_t, IP_t) = \infty$  and

$\lim_{IP_t \rightarrow -\infty} H_t(x_t, IP_t) = \infty$ .  $IP_t^*$  is the unique minimizer of  $H_t(x_t, IP_t)$  as a function of  $IP_t$ . When  $x_t \geq IP_t^*$ ,

Appendix for Managing Inventory over a Short Season: Models with Two Procurement Opportunities  
 if an order is forced to be placed then the optimal order size is zero by the convexity of  $H_t(x_t, IP_t)$  with respect to  $IP_t$ . Therefore  $j_t(x_t) \geq k_t(x_t)$  holds true when  $x_t \geq IP_t^*$  since the  $k_t(x_t)$  solution still keeps an order opportunity, while starting with the same inventory level as the  $j_t(x_t)$  solution.

We next focus on the case when  $x_t < IP_t^*$ . From (8) and the expression for  $H_t(x_t, IP_t)$  above,

$$j_t(x_t) = -c_t x_t + c_t IP_t^* + c_u \int_{IP_t^*}^{\infty} (\xi_{t,T} - IP_t^*) f_{t,T}(\xi_{t,T}) d\xi_{t,T} + c_d \int_0^{IP_t^*} (IP_t^* - \xi_{t,T}) f_{t,T}(\xi_{t,T}) d\xi_{t,T} \\ + \sum_{t'=t}^T h_{t'} \int_0^{IP_{t'}^*} (IP_{t'}^* - \xi_{t,t'}) f_{t,t'}(\xi_{t,t'}) d\xi_{t,t'}$$

Thus, to compare  $j_t(x_t)$  and  $k_t(x_t)$ , it is sufficient to compare  $\Theta_t$  and  $K_t(x_t) = k_t(x_t) + c_t x_t$ , where

$$\Theta_t = c_t IP_t^* + c_u \int_{IP_t^*}^{\infty} (\xi_{t,T} - IP_t^*) f_{t,T}(\xi_{t,T}) d\xi_{t,T} + c_d \int_0^{IP_t^*} (IP_t^* - \xi_{t,T}) f_{t,T}(\xi_{t,T}) d\xi_{t,T} \\ + \sum_{t'=t}^T h_{t'} \int_0^{IP_{t'}^*} (IP_{t'}^* - \xi_{t,t'}) f_{t,t'}(\xi_{t,t'}) d\xi_{t,t'}$$

(Note for  $x_t \geq IP_t^*$ ,  $K_t(x_t) \leq \Theta_t$ .) The question that needs to be answered next is: Given that we are at the beginning of period  $t$  and the inventory level  $x_t < IP_t^*$ , for what values of  $x_t$  is it optimal to place an order? We answer this question in a recursive manner by starting from  $t = T$ .

### Case $t = T$

It is easy to see that  $k_T(x_T) = H_T(x_T, x_T)$ , thus  $K_T(x_T)$  is convex and minimized at  $IP_T^*$ , and

$\Theta_T \leq K_T(x_T)$  for  $x_T \leq IP_T^*$ . Therefore the optimal policy at the beginning of period  $T$  is: If  $x_T \leq IP_T^*$

then it is optimal to raise the inventory level to  $IP_T^*$ . As a result,  $\rho_T(x_T)$  is convex in  $x_T$ .

Before further discussion we state a lemma which will be used later.

**Lemma 3.**  $K_t'(x_t) < 0$  for  $x_t \leq 0$  and  $t \leq T - 1$ .

Appendix for Managing Inventory over a Short Season: Models with Two Procurement Opportunities

**Proof** “ $x_t \leq 0$ ” implies that there must be an order placement in one of the remaining  $T - t$  periods by

the backordering assumption and the assumption  $c_u > \max\{c_1, c_2, \dots, c_T\}$ . Suppose it is placed in period

$t_1$  ( $t_1 > t$ ) with a unit price of  $c_{t_1}$ . Then we have

$$\begin{aligned} K_t'(x_t) &= c_t - b_t \int_{x_t}^{\infty} f_t(\xi_t) d\xi_t + h_t \int_0^{x_t} f_t(\xi_t) d\xi_t + \int_0^{\infty} \rho_{t+1}'(x_t - \xi_t) f_t(\xi_t) d\xi_t \\ &= c_t - b_t - \dots - b_{t_1-1} - c_{t_1} < 0 \end{aligned}$$

Knowing that  $K_t(IP_t^*) \leq \Theta_t$ , Lemma 3 suggests that  $\Theta_t$  and  $K_t(x_t)$  cross at least once over

$(-\infty, IP_t^*]$  (note here  $\Theta_t$  is a constant function with respect to  $x_t$ ). In what follows we show that they

cross only once.

**Case  $t = T - 1$**

To show that  $\Theta_{T-1}$  and  $K_{T-1}(x_{T-1})$  cross once over  $(-\infty, IP_{T-1}^*]$ , it is sufficient to show that

$K_{T-1}(x_{T-1})$  is convex in  $x_{T-1}$ . Notice that

$$\begin{aligned} K_{T-1}(x_{T-1}) &= c_{T-1}x_{T-1} + b_{T-1} \int_{x_{T-1}}^{\infty} (\xi_{T-1} - x_{T-1}) f_{T-1}(\xi_{T-1}) d\xi_{T-1} + h_{T-1} \int_0^{x_{T-1}} (x_{T-1} - \xi_{T-1}) f_{T-1}(\xi_{T-1}) d\xi_{T-1} \\ &\quad + \int_0^{\infty} \rho_T(x_{T-1} - \xi_{T-1}) f_{T-1}(\xi_{T-1}) d\xi_{T-1} \end{aligned}$$

The convexity of  $K_{T-1}(x_{T-1})$  follows because each term in the R.H.S. is convex in  $x_{T-1}$ .

In what follows to show that  $\Theta_t$  and  $K_t(x_t)$  cross once for all  $t \leq T - 2$ , we show that  $K_t(x_t)$

is unimodal for all  $t \leq T - 2$ . Notice that

$$\begin{aligned} K_t'(x_t) &= c_t - b_t \int_{x_t}^{\infty} f_t(\xi_t) d\xi_t + h_t \int_0^{x_t} f_t(\xi_t) d\xi_t + \int_0^{\infty} \rho_{t+1}'(x_t - \xi_t) f_t(\xi_t) d\xi_t \\ &= \int_{-\infty}^{\infty} M_t(u) f_t(x_t - u) du \end{aligned} \tag{13}$$

where

$$M_t(u) = \begin{cases} c_t - b_t + \rho_{t+1}'(u) & \text{if } u \leq 0 \\ c_t + h_t + \rho_{t+1}'(u) & \text{if } u > 0 \end{cases}$$

Appendix for Managing Inventory over a Short Season: Models with Two Procurement Opportunities

To prove that  $K_t(x_t)$  is unimodal, it is sufficient to show that  $K_t'(x_t)$  changes sign once over  $(-\infty, \infty)$ .

It is then sufficient to show that  $M_t(u)$  changes sign once over  $(-\infty, \infty)$  since  $f_t$  is a  $PF_2$  density. We

first discuss the special case  $t = T - 2$ ; Then we discuss the general case by induction.

**Case  $t = T - 2$**

We follow two steps to prove that  $M_{T-2}(y)$  changes sign once over  $(-\infty, \infty)$ .

Step 1: Claim  $M_{T-2}(y)$  is negative when  $y \leq 0$ . In fact, if  $y \leq 0$ , we have

$$M_{T-2}(y) = \begin{cases} c_{T-2} - b_{T-2} + j_{T-1}'(y) & \text{if } s_{T-1} > 0 \\ c_{T-2} - b_{T-2} + j_{T-1}'(y) & \text{if } s_{T-1} \leq 0 \text{ \& } y < s_{T-1} \\ c_{T-2} - b_{T-2} + k_{T-1}'(y) & \text{if } s_{T-1} \leq 0 \text{ \& } y \geq s_{T-1} \end{cases}$$

$$= \begin{cases} c_{T-2} - b_{T-2} - c_{T-1} & \text{if } s_{T-1} > 0 \\ c_{T-2} - b_{T-2} - c_{T-1} & \text{if } s_{T-1} \leq 0 \text{ \& } y < s_{T-1} \\ c_{T-2} - b_{T-2} - c_{T-1} + K_{T-1}'(y) & \text{if } s_{T-1} \leq 0 \text{ \& } y \geq s_{T-1} \end{cases}$$

$$< 0$$

where  $s_{T-1}$  is the order-triggering point in period  $T - 1$ .

Step 2:  $M_{T-2}(y)$  changes sign at most once over  $(0, \infty)$  from “-” to “+”.

Without loss of generality, we can only discuss the case  $s_{T-1} > 0$  since the opposite case can be discussed similarly. Notice that

$$c_{T-2} + h_{T-2} + \rho_{T-1}'(y) = \begin{cases} c_{T-2} + h_{T-2} - c_{T-1} & \text{if } y < s_{T-1} \\ c_{T-2} + h_{T-2} - c_{T-1} + K_{T-1}'(y) & \text{if } y \geq s_{T-1} \end{cases}$$

$c_{T-2} + h_{T-2} + \rho_{T-1}'(y)$  is negative if  $y < s_{T-1}$ ; For  $y \geq s_{T-1}$ ,  $c_{T-2} + h_{T-2} + \rho_{T-1}'(y)$  increases to a positive value of  $c_{T-2} + h_{T-2} + c_d$  as  $y$  approaches to  $\infty$  by the convexity of  $K_{T-1}(y)$ , which follows from the convexity of  $\rho_T(x_T)$ . Therefore  $c_{T-2} + h_{T-2} + \rho_{T-1}'(y)$  changes sign at most once as  $y$  traverses from 0 to  $\infty$ .

Appendix for Managing Inventory over a Short Season: Models with Two Procurement Opportunities

Similarly, we can show that  $c_{T-3} + h_{T-3} - c_{T-2} + M_{T-2}(y)$  changes sign once over  $(-\infty, \infty)$  from “-” to “+”.

Case General  $t$

Analogous to the case  $t = T - 2$ , we follow two steps to show that  $M_t(y)$  changes signs once.

Step 1: Claim  $M_t(y)$  is negative when  $y \leq 0$ . A logic similar to that for case  $\tau = T - 2$  can be applied.

Step 2:  $M_t(y)$  changes sign at most once over  $(0, \infty)$  from “-” to “+”.

Without loss of generality, we can only discuss the case  $s_{t+1} > 0$ , since the opposite case can be discussed similarly. We will discuss the sign of  $M_t(y)$  for different categories of  $y$ . For  $0 < y < s_{t+1}$ ,

$M_t(y) = c_t + h_t + \rho_{t+1}'(y) = c_t + h_t + j_{t+1}'(y) = c_t + h_t - c_{t+1} \leq 0$ . For  $s_{t+1} \leq y$

$$\begin{aligned} M_t(y) &= c_t + h_t + \rho_{t+1}'(y) = c_t + h_t + k_{t+1}'(y) \\ &= c_t + h_t - c_{t+1} + K_{t+1}'(y) \\ &= \int_{-\infty}^{\infty} (c_t + h_t - c_{t+1} + M_{t+1}(u)) f_{t+1}(y-u) du \end{aligned}$$

Since  $c_t + h_t - c_{t+1} + M_{t+1}(u)$  changes sign once over  $(-\infty, \infty)$ ,  $M_t(y)$  changes sign at most once over  $[s_{t+1}, \infty)$ . In particular, if it does change sign once then the sign changes from negative to positive;

Otherwise the sign remains positive. For either case,  $M_t(y)$  changes sign at most once over  $(0, \infty)$ .

To summarize, for general  $t$ , we show that  $M_t(y)$  changes sign once from negative to positive as  $y$  traverses from  $-\infty$  to  $\infty$ . Similarly, we can show that  $c_{t-1} + h_{t-1} - c_t + M_t(u)$  changes sign once over  $(-\infty, \infty)$  from “-” to “+”.

By induction, we have shown that  $K_t(x_t)$  is unimodal for  $t \leq T - 2$ . Therefore there exists a unique  $x_t = s_t < IP_t^*$  such that  $K_t(x_t)$  intersects with  $\Theta_t$ , i.e., an  $(s, S)$  policy with  $s = s_t, S = IP_t^*$  is optimal.

Appendix for Managing Inventory over a Short Season: Models with Two Procurement Opportunities

2) Since  $L > 0, b_1 = \dots = b_{T-1} = 0, b_T \geq 0$ , period  $T - L + 1$  is the last period when an order can be

placed. Moreover, we can see that  $H_t(x_t, IP_t)$  has an expression below

$$H_t(x_t, IP_t) = \begin{cases} c_t(IP_t - x_t) + b_T \int_{x_t}^{IP_t} (\xi_{t,T} - x_t) f_{t,T}(\xi_{t,T}) d\xi_t + b_T \int_{IP_t}^{\infty} IP_t f_{t,T}(\xi_{t,T}) d\xi_t \\ \quad + c_u \int_{IP_t}^{\infty} (\xi_{t,T} - IP_t) f_{t,T}(\xi_{t,T}) d\xi_t + c_d \int_0^{IP_t} (IP_t - \xi_{t,T}) f_{t,T}(\xi_{t,T}) d\xi_t & t = T - L + 1 \\ \quad + \sum_{t'=\tau}^{\tau+L-1} h_{t'} \int_0^{x_t} (x_t - \xi_{\tau,t'}) f_{\tau,t'}(\xi_{\tau,t'}) d\xi_{\tau,t'} \\ c_t(IP_t - x_t) + c_u \int_{IP_t}^{\infty} (\xi_{t,T} - IP_t) f_{t,T}(\xi_{t,T}) d\xi_t + c_d \int_0^{IP_t} (IP_t - \xi_{t,T}) f_{t,T}(\xi_{t,T}) d\xi_t \\ \quad + \sum_{t'=\tau}^{\tau+L-1} h_{t'} \int_0^{x_t} (x_t - \xi_{\tau,t'}) f_{\tau,t'}(\xi_{\tau,t'}) d\xi_{\tau,t'} & t < T - L + 1 \end{cases}$$

$k_t(x_t)$  can be recursively expressed as  $k_t(x_t) = h_t \int_0^{x_t} (x_t - \xi_t) f_t(\xi_t) d\xi_t + \int_0^{\infty} \rho_{t+1}(x_t - \xi_t) f_t(\xi_t) d\xi_t$

for  $t < T - L + 1$ , and expressed as  $k_t(x_t) = H_t(x_t, x_t)$  for  $t = T - L + 1$ . Then the approach in the proof for part 1) of Theorem 2 can be applied to establish the conclusion. ■

**Proof of Theorem 3.** It is sufficient to show that  $TC_{II}(Q_0)$  is unimodal. Since  $TC_{II}(Q_0)$  has a negative slope  $c_0 - c_1$  for  $Q_0 < s_1$ , it remains to show that  $TC_{II}(Q_0)$  is unimodal over  $(s_1, \infty)$ . This is true since  $TC_{II}(Q_0)$ , with an expression below

$$TC_{II}(Q_0) = c_0 Q_0 + b_1 \int_{Q_0}^{\infty} (\xi_1 - Q_0) f_1(\xi_1) d\xi_1 + h_1 \int_0^{Q_0} (Q_0 - \xi_1) f_1(\xi_1) d\xi_1 + \int_0^{\infty} \rho_2(Q_0 - \xi_1) f_1(\xi_1) d\xi_1$$

has a structure similar to  $K_1(x_1)$ , which we have shown is unimodal. ■

**Proof of Corollary 1.** It can be seen that in the 3-period problem,  $j_2(x)$  and  $k_2(x)$  have the following expressions, respectively,

$$j_2(x) = c_2 (IP_2^* - x) + h_2 \int_0^{IP_2^*} (IP_2^* - \xi_2) f_2(\xi_2) d\xi_2 \\ + (h_3 + c_d) \int_0^{IP_2^*} (IP_2^* - \xi_{23}) f_{23}(\xi_{23}) d\xi_{23} + c_u \int_{IP_2^*}^{\infty} (\xi_{23} - IP_2^*) f_{23}(\xi_{23}) d\xi_{23}$$

Appendix for Managing Inventory over a Short Season: Models with Two Procurement Opportunities

$$\begin{aligned}
 k_2(x) = & b_2 \int_x^\infty (\xi_2 - x) f_2(\xi_2) d\xi_2 + h_2 \int_0^x (x - \xi_2) f_2(\xi_2) d\xi_2 \\
 & + \int_{x-IP_3^*}^\infty \left( c_3 (IP_3^* - x + \xi_2) + c_u \int_{IP_3^*}^\infty (\xi_3 - IP_3^*) f_3(\xi_3) d\xi_3 + (h_3 + c_d) \int_0^{IP_3^*} (IP_3^* - \xi_3) f_3(\xi_3) d\xi_3 \right) f_2(\xi_2) d\xi_2 \\
 & + \int_0^{x-IP_3^*} \left( c_u \int_{x-\xi_2}^\infty (\xi_3 - x + \xi_2) f_3(\xi_3) d\xi_3 + (h_3 + c_d) \int_0^{IP_3^*} (IP_3^* - \xi_3) f_3(\xi_3) d\xi_3 \right) f_2(\xi_2) d\xi_2
 \end{aligned}$$

From the expressions above we can see that,  $\Delta_2(x) \hat{=} j_2(x) - k_2(x)$ , is convex in  $x$ . Notice that

$\Delta_2(x)$  is positive at  $IP_2^*$  and is negative at  $-\infty$ . Putting the convexity of  $\Delta_2(x)$  and its

boundary conditions together allows us to claim that  $\Delta_2(x)$  is monotonically increasing in  $x$ .

With a little algebra, taking derivative with respect to  $c_2$  and  $c_3$  yields, respectively,

$$\frac{\partial \Delta_2(x)}{\partial c_2} = IP_2^* - x > 0$$

$$\frac{\partial \Delta_2(x)}{\partial c_3} = - \int_{x-IP_3^*}^\infty (IP_3^* - x + \xi_2) f_2(\xi_2) d\xi_2 < 0$$

That is,  $\Delta_2(x)$  is increasing in  $c_2$  and is decreasing in  $c_3$ . Since  $\Delta_2(x)$  is monotonically

increasing in  $x$ , the root of  $\Delta_2(x) = 0$ ,  $s_2$ , is decreasing in  $c_2$  and is increasing in  $c_3$ . ■
